# Supplementary material for: Responsive methylene blue release from lanthanide coordination polymer for label-free, immobilization-free and sensitive electrochemical alkaline phosphatase activity assay
Source: Royal Society of Chemistry journal article supplement (doi:10.1039/c9an01325c), 2019-01-01
Supplement: c9an01325c1.pdf [file c9an01325c1.pdf]

Supporting information

**Responsive methylene blue releasing from lanthanide coordination polymer for label-free, immobilization-free and sensitive electrochemical alkaline phosphatase activity assay**

Zhiqiang Chen, Shuang Liu, Xiaoxiao Yu, Lijie Hao, Li Wang and Shufeng Liu\*

Key Laboratory of Optic-Electric Sensing and Analytical Chemistry for Life Science, Ministry of Education, College of Chemistry and Molecular Engineering, Qingdao University of Science and Technology, 53 Zhengzhou Road, Qingdao, Shandong 266042, China

\* Corresponding author. E-mail: [sliu@qust.edu.cn](mailto:sliu@qust.edu.cn).

**Table of contents**

|                         |           |
|-------------------------|-----------|
| <b>Figure S1</b> -----  | <b>S2</b> |
| <b>Figure S2</b> -----  | <b>S3</b> |
| <b>Figure S3</b> -----  | <b>S4</b> |
| <b>Figure S4</b> -----  | <b>S5</b> |
| <b>Figure S5</b> -----  | <b>S6</b> |
| <b>Table S1</b> -----   | <b>S7</b> |
| <b>Table S2</b> -----   | <b>S8</b> |
| <b>References</b> ----- | <b>S9</b> |

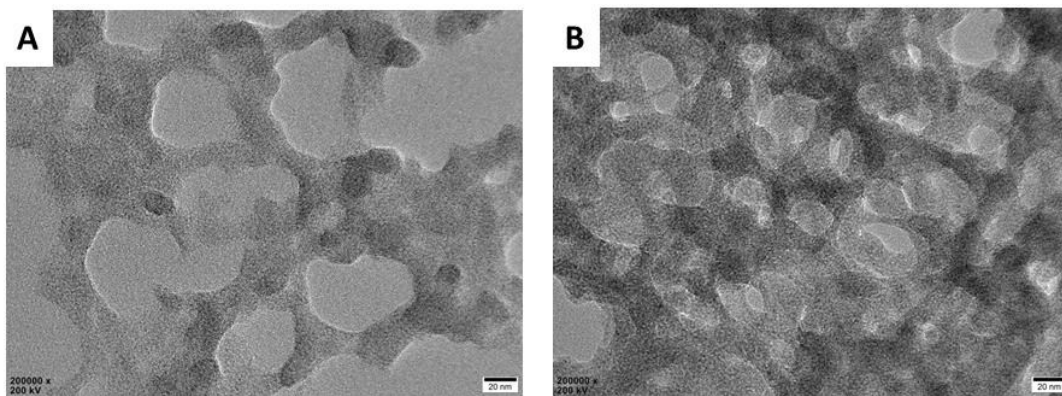

**Figure S1.** High-resolution TEM images of GMP-Tb (A) and MB@GMP-Tb (B) coordination polymer

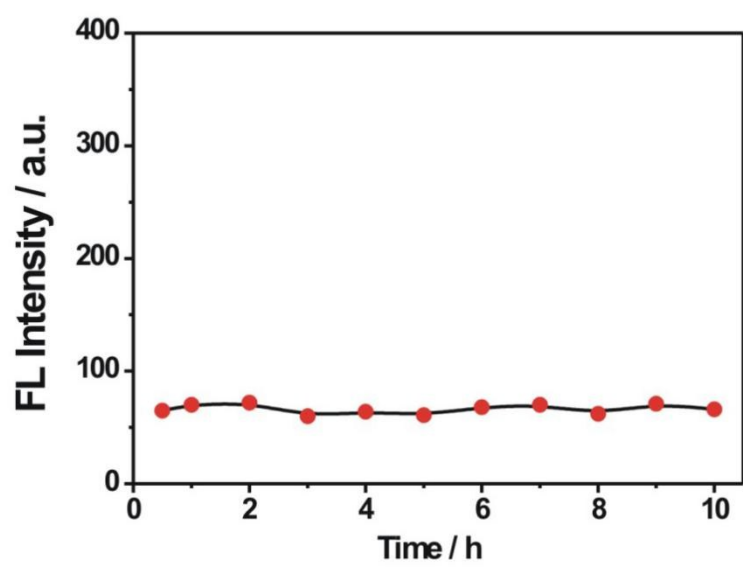

**Figure S2.** The fluorescence intensity of MB@GMP-Tb at 682 nm versus time.

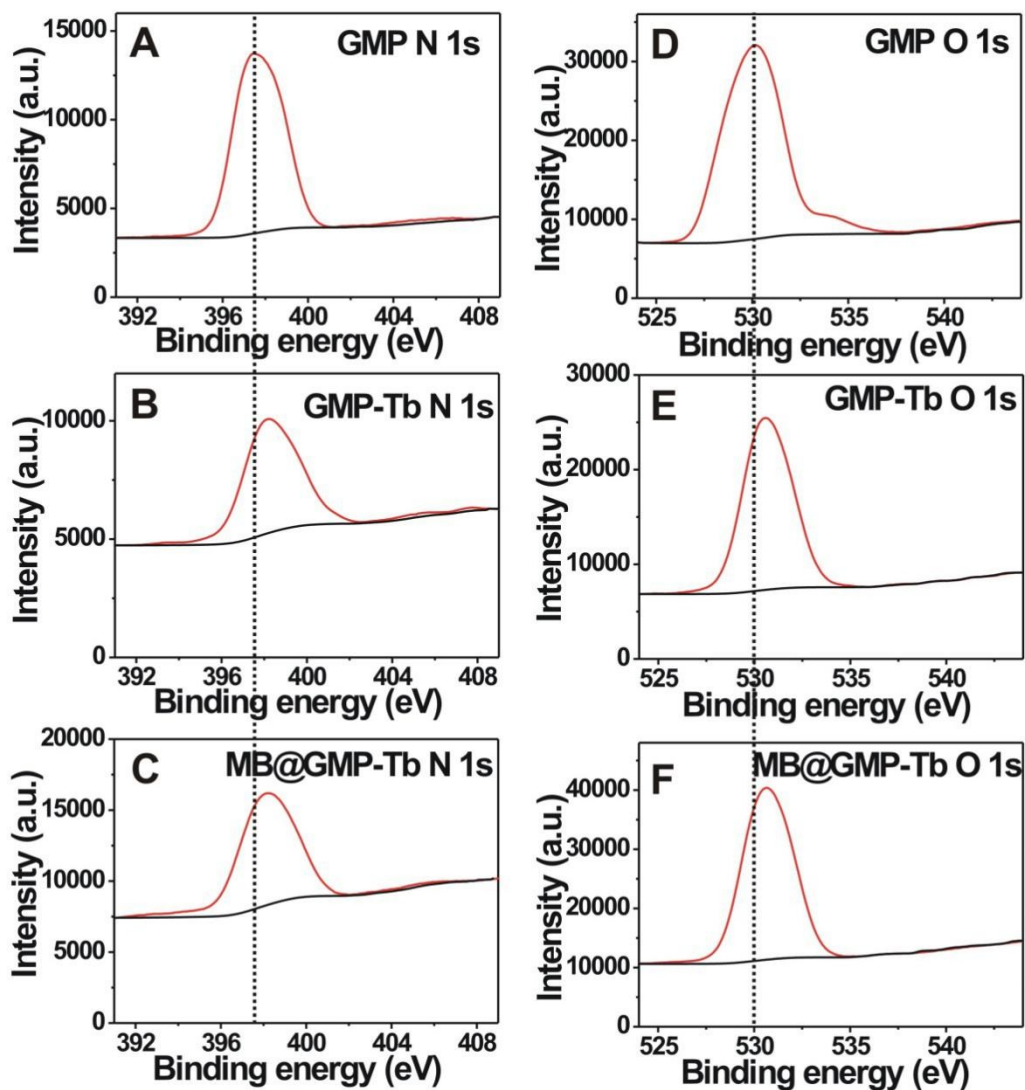

**Figure S3.** The N 1s (A, B, C) and O 1s (D, E, F) binding energy of GMP, GMP-Tb, and MB@GMP-Tb.

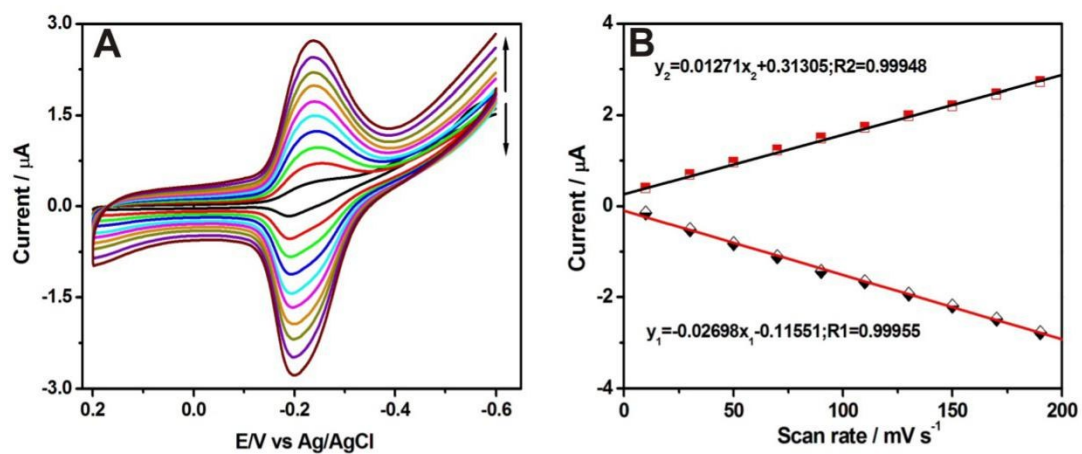

**Figure S4.** (A) Cyclic voltammograms obtained in the presence of 2.0 U/mL ALP at various scan rates from 10 mV/s to 190 mV/s. (B) The plots of anodic and cathodic peak currents vs scan rates.

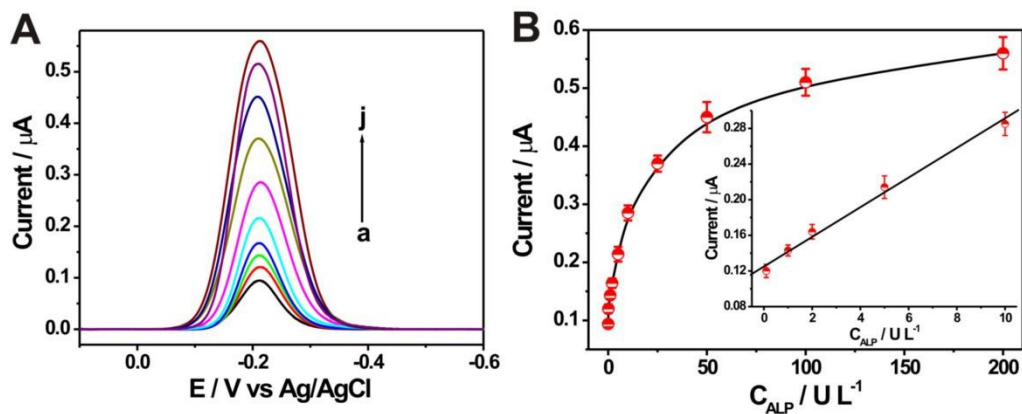

**Figure S5.** (A) SWV responses corresponding to different concentrations of ALP. The electrochemical measurements were conducted in 50 mM Tris-HCl buffer (pH 8.0, 1 mM  $\text{MgCl}_2$ ) after ALP-treated MB releasing from MB@GMP-Tb and successive MB enrichment onto the dodecanethiol monolayer-assembled electrode. The curves from a to j for ALP concentrations were 0, 0.1, 1, 2, 5, 10, 25, 50, 100 and 200 U/L, respectively. (B) Calibration curve between the SWV peak currents and ALP concentrations. Inset shows the linear relationship between the SWV peak current and the ALP concentration (0.1 to 10 U/L).

**Table S1.** Detection performance comparison toward ALP by current method with these reported methods

| Method              | Linear range(U/L)      | LOD (U/L)        | Strategy                                                              | Ref.      |
|---------------------|------------------------|------------------|-----------------------------------------------------------------------|-----------|
| Fluorescence        | 25-200                 | 10               | Responsive infinite coordination polymer                              | 1         |
| Fluorescence        | 1-400                  | 0.4              | Au-NPs@GMP-Tb core-shell nanoparticles                                | 2         |
| Fluorescence        | 10-2500                | 3.3              | Infinite coordination polymer nanoparticles (CyOH@Tb-GMP)             | 3         |
| Fluorescence        | 0.01-10                | 0.01             | Chromogenic interaction of diethanolamine with 4-aminophenol          | 4         |
| Fluorescence        | None                   | 18               | Aggregation and deaggregation of tetraphenylethylenemolecules         | 5         |
| Fluorescence        | 4.6-383.3              | 1.4              | Aggregation and disaggregation of carbon quantum dots                 | 6         |
| Fluorescence        | None                   | 100              | Betaine-modified polyethylenimine via excimer/monomer conversion      | 7         |
| Fluorescence        | 3.4-100                | 0.9              | $\beta$ -cyclodextrin-modified carbon quantum dots                    | 8         |
| Fluorescence        | 0-220                  | 0.27             | Fluorescence quenching                                                | 9         |
| Fluorescence        | 2.5-45                 | 0.4              | Nitrogen-doped Carbon Dots                                            | 10        |
| Fluorescence        | 0-10                   | 0.47             | Target-promoted exponential strand displacement                       | 11        |
| Colorimetry         | None                   | 1000             | Unmodified silver nanoparticles                                       | 12        |
| Colorimetry         | None                   | 8000             | Non-crosslinking gold nanoparticle aggregation                        | 13        |
| Colorimetry         | 0-200                  | 1.25             | Cu(II)-phenanthroline complex                                         | 14        |
| Colorimetry         | 0-50                   | 2.3              | phosphate anion-quenched oxidase-mimicking activity of Ce(IV) ions    | 15        |
| Electroluminescence | 2-25                   | 2                | CdSe nanoparticles                                                    | 16        |
| Electrochemistry    | 1-500                  | 0.5              | Phosphate ions induced deposition of redox precipitates               | 17        |
| Electrochemistry    | None                   | 20               | Nanoceria particles as catalytic amplifiers                           | 18        |
| Electrochemistry    | 0.5-20<br>or<br>0.1-10 | 0.5<br>or<br>0.1 | Stimulus responsive MB releasing from lanthanide coordination polymer | This work |

**Table S2.** Recovery experiments of ALP in diluted human serum using the proposed method

| <b>Samples</b> | <b>Added ALP (U/L)</b> | <b>Detected ALP (U/L)</b> | <b>Recovery (%)</b> |
|----------------|------------------------|---------------------------|---------------------|
| 1              | 0                      | $1.97 \pm 0.15$           | /                   |
| 2              | 5                      | $7.23 \pm 0.53$           | 105                 |
| 3              | 10                     | $12.27 \pm 0.76$          | 103                 |
| 4              | 15                     | $16.57 \pm 0.92$          | 97                  |

The recovery rate was obtained based on the ratio of the detected ALP value (after deduction of the original ALP value in the diluted serum) to the added ALP value.



## REFERENCES

- [1] J. Deng, P. Yu, Y. Wang and L. Mao, *Anal. Chem.*, 2015, **87**, 3080.
- [2] X. Zhang, J. Deng, Y. Xue, G. Shi and T. Zhou, *Environ. Sci. Technol.*, 2016, **50**, 847.
- [3] J. Ou-Yang, C. Y. Li, Y. F. Li, B. Yang and S. J. Li, *Sensors and Actuators B*, 2018, **255**, 3355.
- [4] J. Sun, J. Zhao, X. Bao, Q. Wang and X. Yang, *Anal. Chem.*, 2018, **90**, 6339.
- [5] X. Gu, G. Zhang, Z. Wang, W. Liu, L. Xiao and D. Zhang, *Analyst*, 2013, **138**, 2427.
- [6] Z. Qian, L. Chai, C. Tang, Y. Huang, J. Chen and H. Feng, *Anal. Chem.*, 2015, **87**, 2966.
- [7] F. Zheng, S. Guo, F. Zeng, J. Li and S. Wu, *Anal. Chem.*, 2014, **86**, 9873.
- [8] C. Tang, Z. Qian, Y. Huang, J. Xu, H. Ao, M. Zhao, J. Zhou, J. Chen and H. Feng, *Biosens. Bioelectron.*, 2016, **83**, 274.
- [9] Y. Mei, Q. Hu, B. Zhou, Y. Zhang, M. He, T. Xu, F. Li and J. Kong, *Talanta*, 2018, **176**, 52.
- [10] Y. Hu, X. Geng, L. Zhang, Z. Huang, J. Ge and Z. Li, *Sci Rep.*, 2017, **7**, 5849.
- [11] C. Y. Lee, K. S. Park and H. G. Park, *Sensors and Actuators B*, 2013, **181**, 382.
- [12] H. Wei, C. Chen, B. Han and E. Wang, *Anal. Chem.*, 2008, **80**, 7051.
- [13] W. Zhao, W. Chiuman, J. C. F. Lam, M. A. Brook and Y. Li, *Chem. Commun.*, 2007, **36**, 3729.
- [14] Q. Hu, M. He, Y. Mei, W. Feng, J. Jing, S. Kong and X. Zhang, *Talanta*, 2017, **163**, 146.
- [15] H. Song, H. Wang, X. Li, Y. Peng, J. Pan and X. Niu, *Anal. Chim. Acta*, 2018, **1044**, 154.
- [16] H. Jiang and X. Wang, *Anal. Chem.*, 2012, **84**, 6986.
- [17] C. Shen, X. Li, A. Rasooly, L. Guo, K. Zhang and M. Yang, *Biosens. Bioelectron.*, 2016, **85**, 220.
- [18] A. Hayat and S. Andreescu, *Anal. Chem.*, 2013, **85**, 10028.
